# Supplementary material for: From Gut to Blood: Spatial and Temporal Pathobiome Dynamics during Acute Abdominal Murine Sepsis
Source: MDPI journal article supplement (doi:10.3390/microorganisms11030627), 2023-02-28
Supplement: s1 [file s1]

| Figure | Mouse # in Figure | Unique Mouse ID |
|--------|-------------------|-----------------|
| 2A     | 1                 | 3805            |
|        | 2                 | 3806            |
|        | 3                 | 3807            |
|        | 4                 | 3809            |
|        | 5                 | 3810            |
|        | 6                 | 3811            |
|        | 7                 | 3812            |
|        | 8                 | 3813            |
|        | 9                 | 3814            |
|        | 10                | 3815            |
|        | 11                | 3816            |
|        | 12                | 3818            |
|        | 13                | 3819            |
|        | 14                | 3820            |
|        | 15                | 3822            |
|        | 16                | 3823            |
|        | 17                | 3824            |
|        | 18                | 3826            |
|        | 19                | 3827            |
|        | 20                | 3828            |
|        | 21                | 3829            |
|        | 22                | 3830            |
|        | 23                | 3831            |
|        | 24                | 3832            |
|        | 25                | 3833            |
|        | 26                | 3834            |

|         |    |      |
|---------|----|------|
| 2B      | 1  | 3811 |
|         | 2  | 3832 |
|         | 1  | 3832 |
|         | 2  | 3814 |
|         | 1  | 3811 |
|         | 2  | 3812 |
| 3 and 4 | 1  | 3601 |
|         | 2  | 3603 |
|         | 3  | 3606 |
|         | 4  | 3607 |
|         | 5  | 3619 |
|         | 6  | 3623 |
|         | 7  | 3858 |
|         | 8  | 3866 |
|         | 9  | 3862 |
|         | 10 | 3867 |
|         | 11 | 3871 |
|         | 12 | 3627 |
|         | 13 | 3609 |
|         | 14 | 3875 |
|         | 15 | 3881 |
| 5       | 1  | 3810 |
|         | 2  | 3814 |
|         | 3  | 3832 |
| 7       | 1  | 3876 |
|         | 2  | 3880 |
