# Supplementary material for: From Gut to Blood: Spatial and Temporal Pathobiome Dynamics during Acute Abdominal Murine Sepsis
Source: MDPI journal article supplement (doi:10.3390/microorganisms11030627), 2023-02-28

**A****diversity in mouse 1**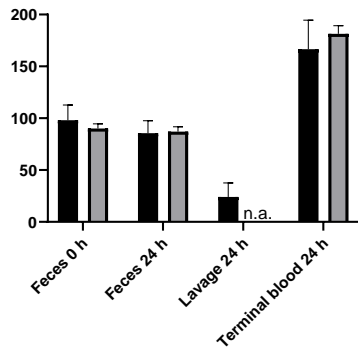**B****diversity in mouse 2**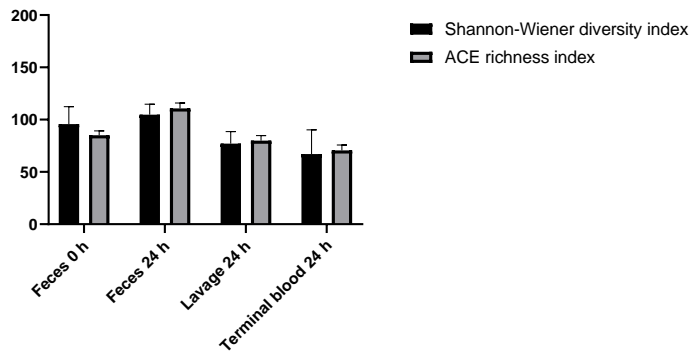**C****diversity in feces**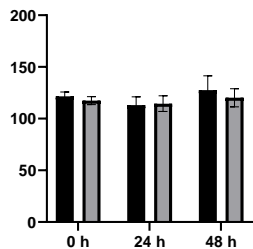**D****diversity in lavage**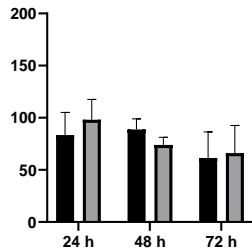**E****diversity in terminal blood**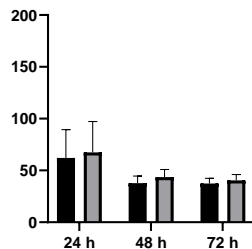

Supplement: s1 [file s1]
