# Supplementary figures and images for: From Gut to Blood: Spatial and Temporal Pathobiome Dynamics during Acute Abdominal Murine Sepsis
Source: MDPI journal article supplement (doi:10.3390/microorganisms11030627), 2023-02-28

A

## Human

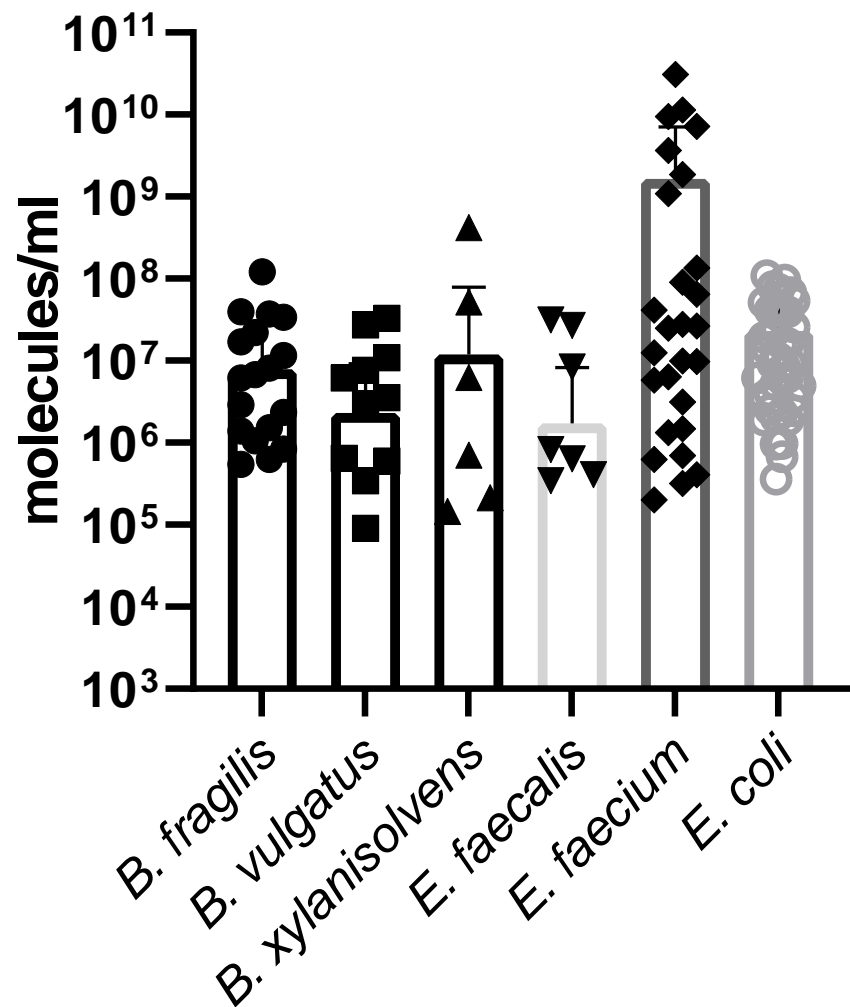

B

## Murine

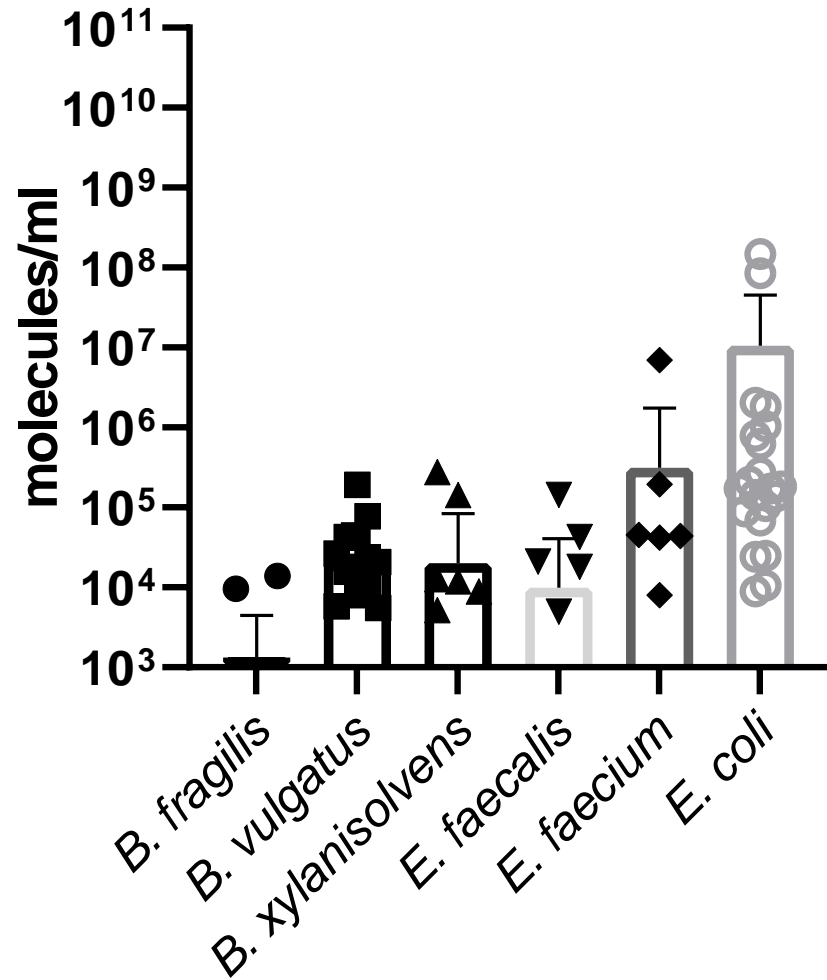

Supplement: s1 [file s1]

IL-1 $\beta$ 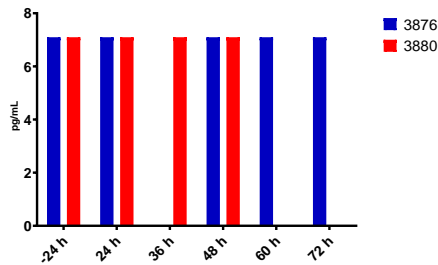

IL-2

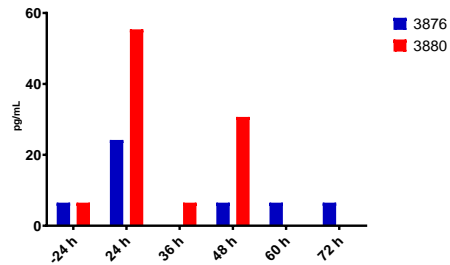

IL-6

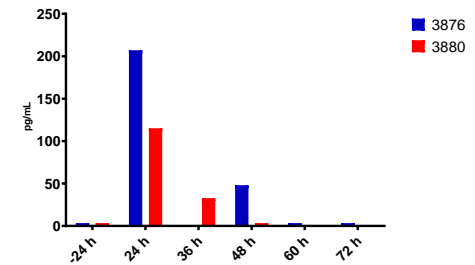

IL-10

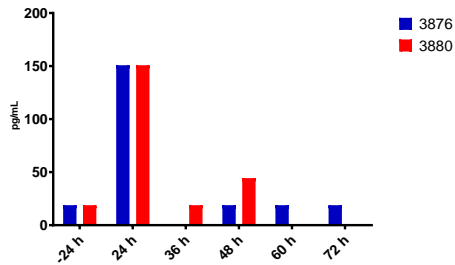

IL-17

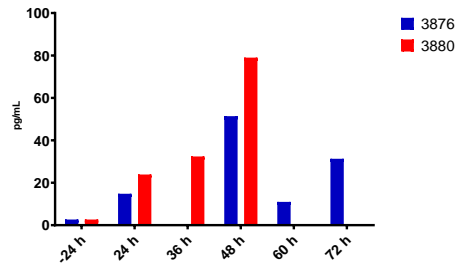IFN- $\gamma$ 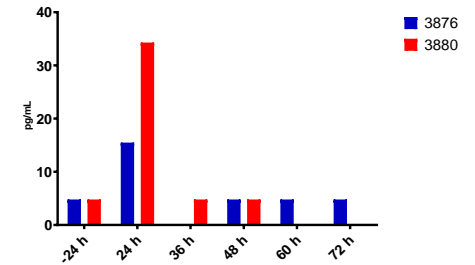

KC

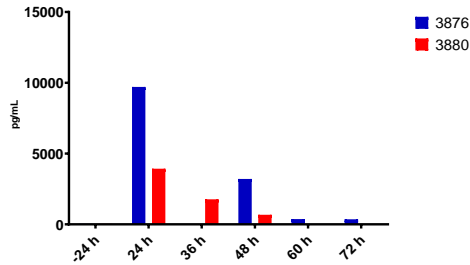

MCP-1

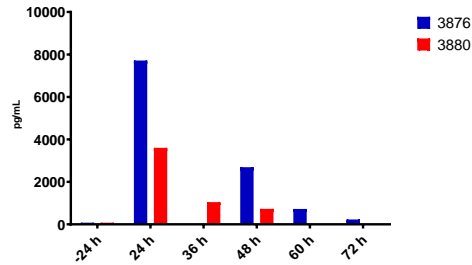TNF- $\alpha$ 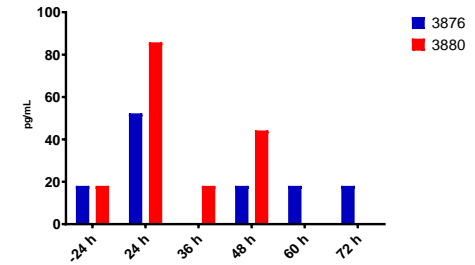

Supplement: s1 [file s1]

A

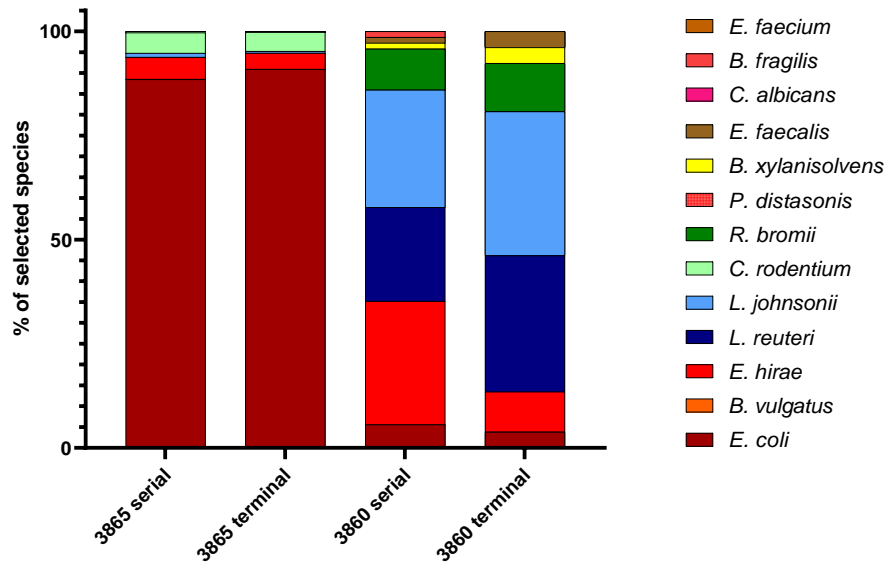

B

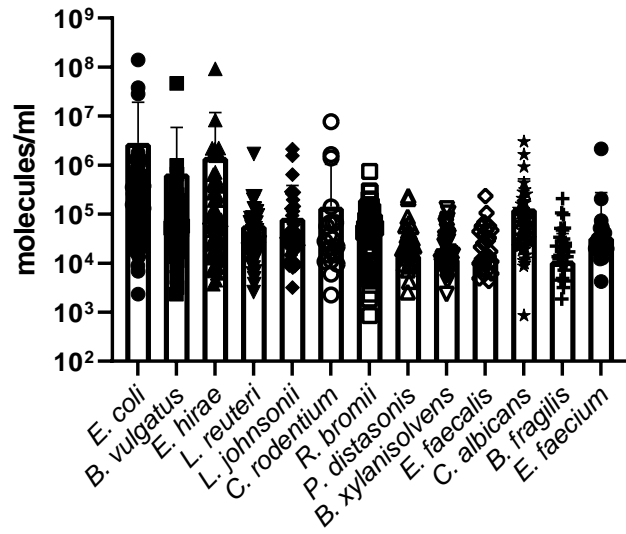

Supplement: s1 [file s1]

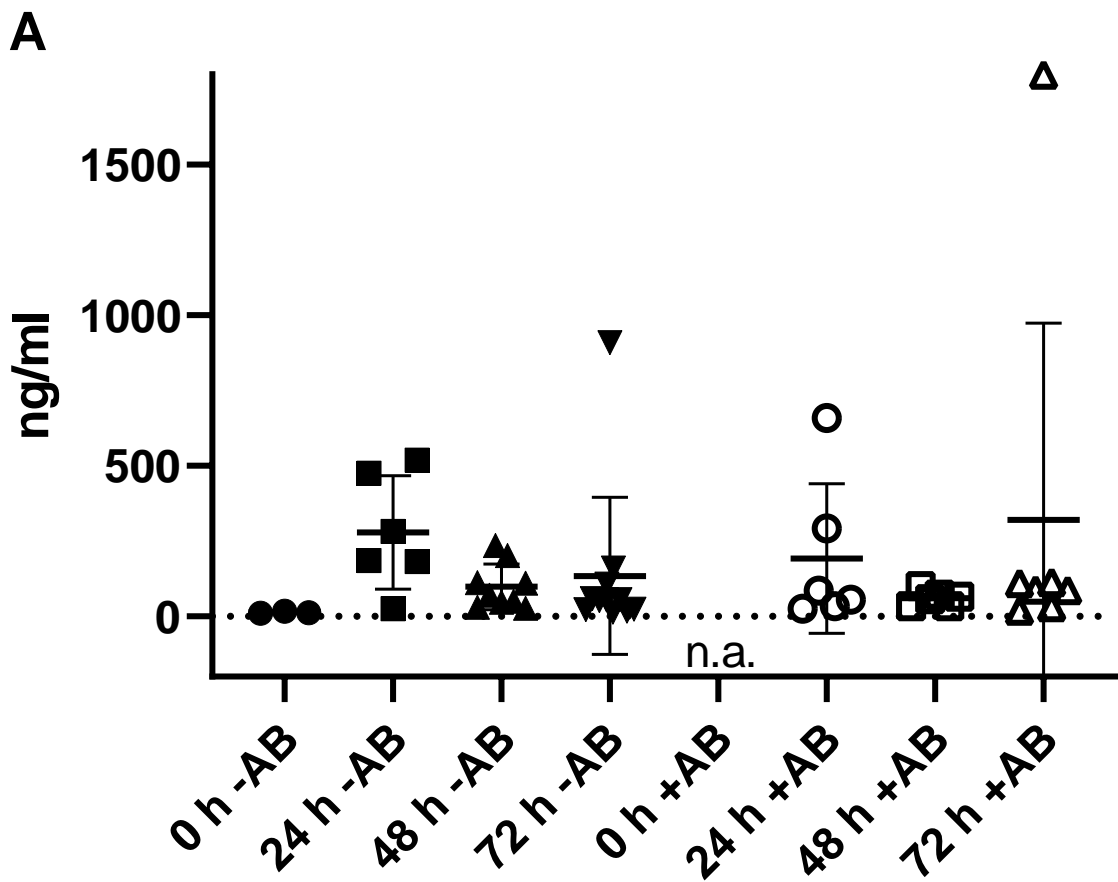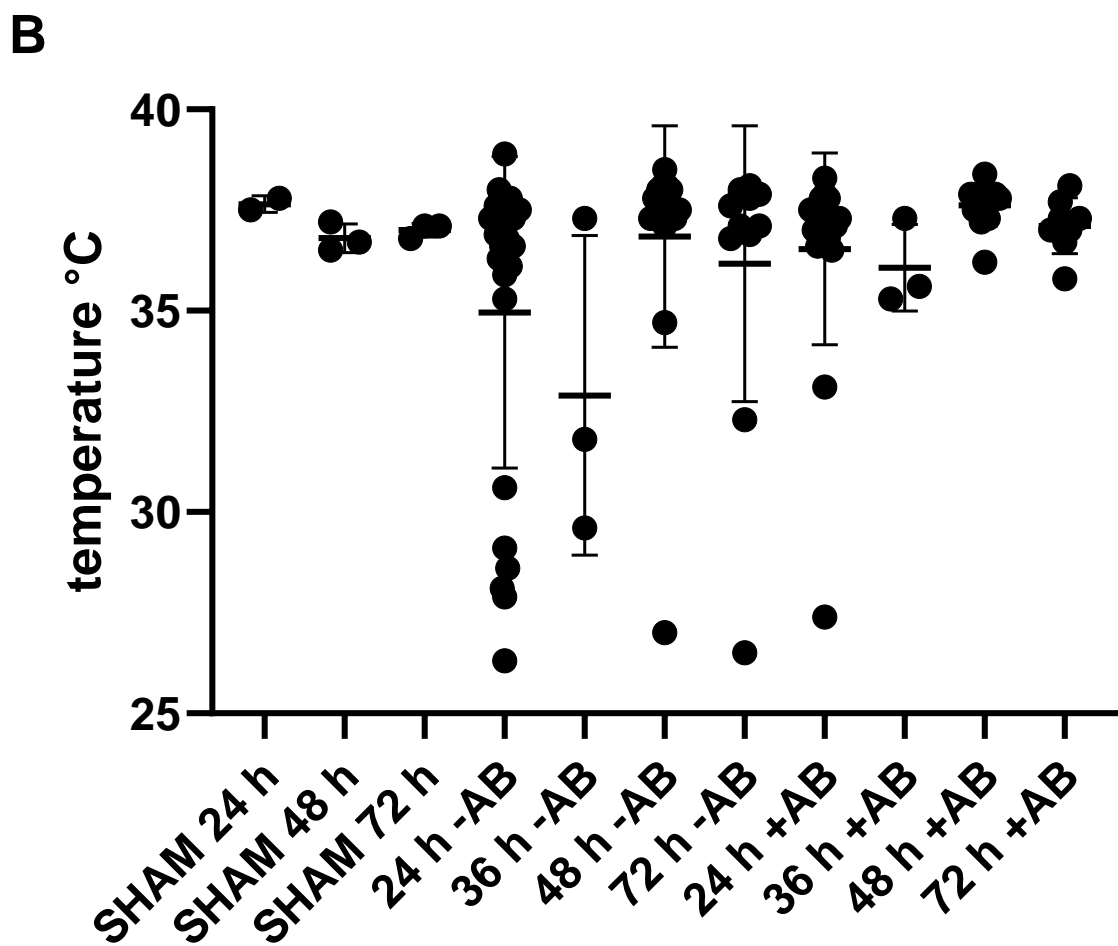

Supplement: s1 [file s1]
